# Supplementary material for: Epsin-mediated degradation of IP3R1 fuels atherosclerosis
Source: PubMed Central journal article supplement (PMC7414107; doi:10.1038/s41467-020-17848-4), 2020-08-07
Supplement: 41467_2020_17848_MOESM7_ESM.pdf [file 41467_2020_17848_MOESM7_ESM.pdf]

**Title:** Supplementary Data file 1

**Description:** Liquid Chromatography with tandem mass spectrometry (LC/MS-MS) proteomic data. Proteins identified in the epsin 1 immunocomplex and IgG control data are shown from top to bottom. The IgG control gel is shown below the IgG control data.

**Title:** Supplementary Data file 2

**Description:** Gene ontology (GO) analysis data. The GO aspects of biological process, cellular component, molecular function, and a summary are shown from top to bottom.

**Title:** Supplementary Data file 3

**Description:** Medical information for human atherosclerosis patient samples. Specific diagnostic information is listed below the summary chart.

**Title:** Supplementary Data file 4

**Description:** List of key resources. Sources of antibodies, reagents, experimental models, recombinant vectors, and PCR primers are shown.
